# Supplementary material
Source: PubMed Central journal article supplement (PMC5744223)
Supplement: JCM.01145-17_zjm999095777s3.pdf [file JCM.01145-17_zjm999095777s3.pdf]

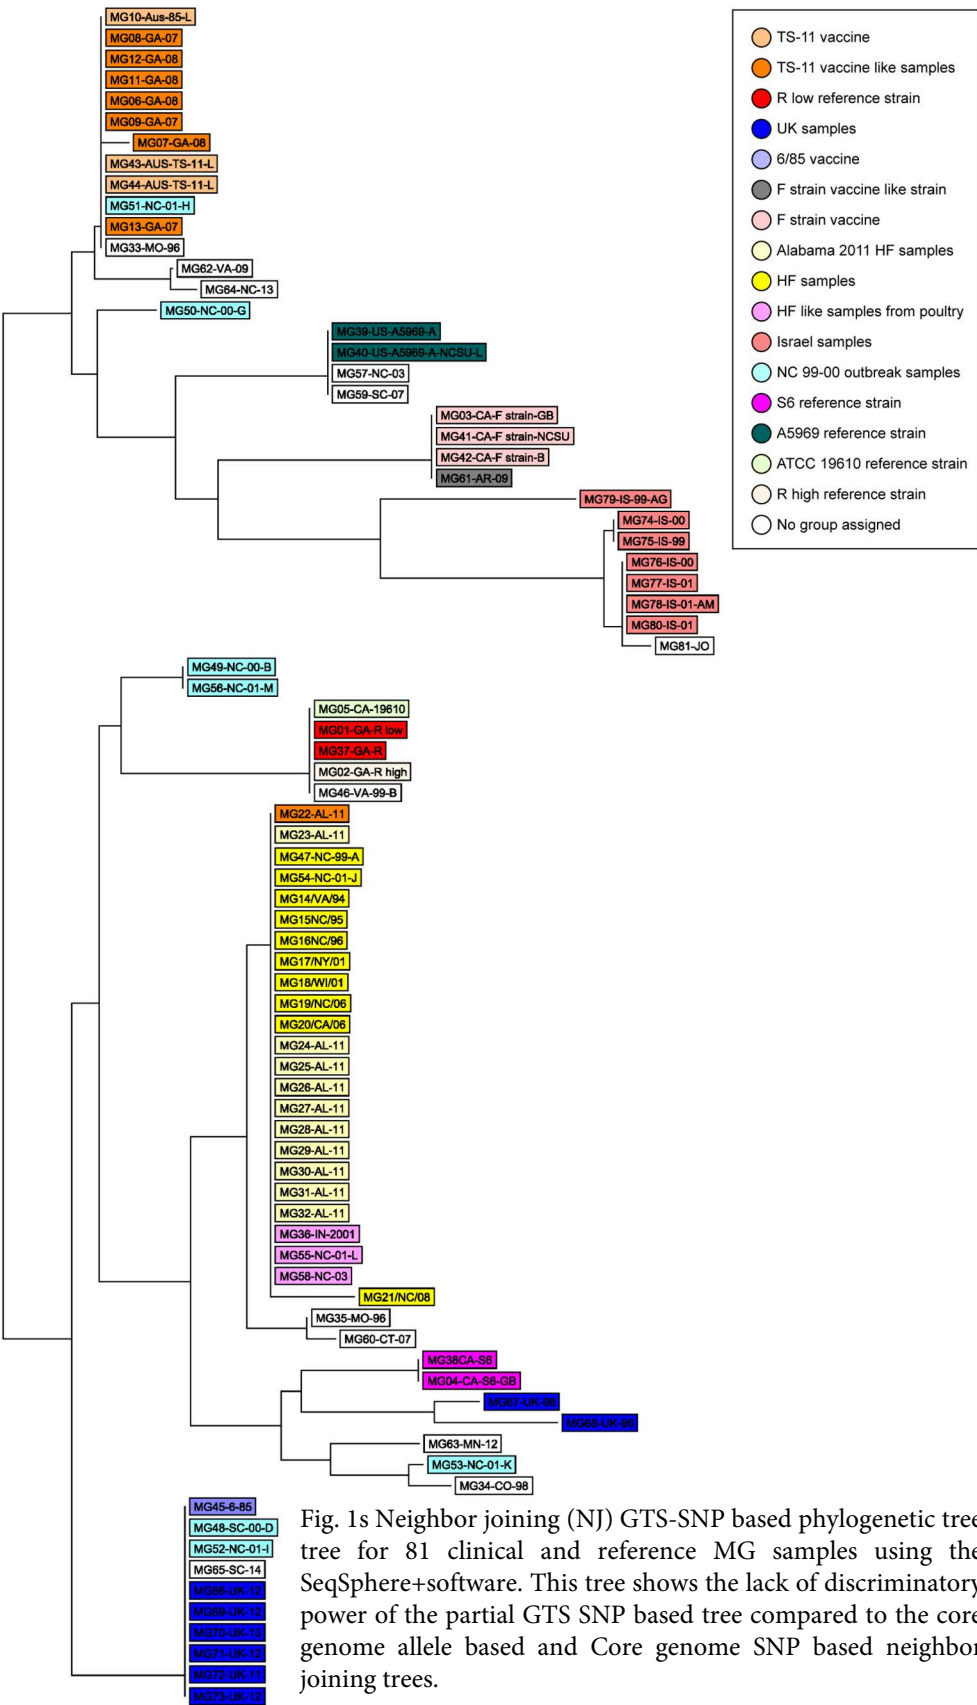

Fig. 1s Neighbor joining (NJ) GTS-SNP based phylogenetic tree for 81 clinical and reference MG samples using the SeqSphere+ software. This tree shows the lack of discriminatory power of the partial GTS SNP based tree compared to the core genome allele based and Core genome SNP based neighbor joining trees.
